# Supplementary material for: Enhanced detection of cell-free DNA (cfDNA) enables its use as a reliable biomarker for diagnosis and prognosis of gastric cancer
Source: PubMed Central journal article supplement (PMC7710035; doi:10.1371/journal.pone.0242145), 2020-12-02
Supplement: pone.0242145.s005.pdf [file pone.0242145.s005.pdf]

|             | Pearson's correlation<br>(vs age) | p value |
|-------------|-----------------------------------|---------|
| cfDNA, Bead | 0.141                             | 0.280   |
| cfDNA, Kit  | 0.129                             | 0.323   |
| LDH         | 0.091                             | 0.486   |
| CRP         | -0.090                            | 0.491   |
