# Supplementary material for: Enhanced detection of cell-free DNA (cfDNA) enables its use as a reliable biomarker for diagnosis and prognosis of gastric cancer
Source: PubMed Central journal article supplement (PMC7710035; doi:10.1371/journal.pone.0242145), 2020-12-02
Supplement: pone.0242145.s006.pdf [file pone.0242145.s006.pdf]

|                              | Woman (n = 20)  | man (n = 41)    | p value |
|------------------------------|-----------------|-----------------|---------|
| cfDNA, Bead<br>(ng/ $\mu$ L) | 4.00 $\pm$ 6.50 | 4.19 $\pm$ 6.62 | 0.918   |
| cfDNA, Kit<br>(ng/ $\mu$ L)  | 2.61 $\pm$ 5.81 | 3.46 $\pm$ 6.49 | 0.624   |
| LDH<br>(U/L)                 | 402 $\pm$ 122   | 385 $\pm$ 94    | 0.553   |
| CRP<br>(ng/ $\mu$ L)         | 2.56 $\pm$ 5.38 | 2.97 $\pm$ 3.63 | 0.73    |
