# Supplementary material for: Enhanced detection of cell-free DNA (cfDNA) enables its use as a reliable biomarker for diagnosis and prognosis of gastric cancer
Source: PubMed Central journal article supplement (PMC7710035; doi:10.1371/journal.pone.0242145), 2020-12-02
Supplement: pone.0242145.s007.pdf [file pone.0242145.s007.pdf]

|                                                                       | cfDNA, Bead<br>(ng/mL)                | cfDNA, Bead<br>(ng/mL)               | LDH<br>(U/L)                          | CRP<br>(ng/μL)                       | CEA<br>(ng/mL)                       | CA19-9 <sup>#</sup><br>(ng/mL)       |
|-----------------------------------------------------------------------|---------------------------------------|--------------------------------------|---------------------------------------|--------------------------------------|--------------------------------------|--------------------------------------|
| <b>All Patients (n = 61)</b>                                          |                                       |                                      | 387.0 (226.0-742.0)                   | 0.50 (0.10-17.70)                    | 2.58 (0.23-1,500)                    | 8.29 (0.60-117.64)                   |
| <b>T Stage</b>                                                        |                                       |                                      |                                       |                                      |                                      |                                      |
| T2 (n = 12)                                                           | 78.3 (0 - 275.8)                      | 15.8 (0 - 202.1)                     | 369.5 (267.0-424.0)                   | 0.50 (0.10-7.10)                     | 2.82 (0.46-8.96)                     | 5.63 (1.74-71.13)                    |
| T3 (n = 12)                                                           | 59.6 (0 - 247.7)                      | 155.8 (60.2 - 377.1)                 | 388.0 (226.0-657.0)                   | 0.50 (0.10-17.60)                    | 3.11 (0.87-92.04)                    | 8.03 (5.49-117.64)                   |
| T4 (n = 37)                                                           | 515.8 (98.3 - 12313.3)                | 130.8 (15.8 - 4590.8)                | 398.0 (265.0-742.0)                   | 0.50 (0.10-17.70)                    | 2.50 (0.23->1,500)                   | 8.57 (0.60-36.87)                    |
| Significance<br>(T2vsT3/T2vsT4/T3vsT4)                                | .976/ .007/ .018                      | .072/ .076/ .907                     | .266/ .250/ .789                      | .713/ .814/ .543                     | .719/ .601/ .429                     | .228/ .731/ .301                     |
| <b>N Stage</b>                                                        |                                       |                                      |                                       |                                      |                                      |                                      |
| N0 (n = 11)                                                           | 87.1 (17.7 - 273.3)                   | 87.1 (6.5 - 3518.3)                  | 334.0 (267.0-437.0)                   | 0.50 (0.10-8.80)                     | 3.02 (0.46-1500.00)                  | 9.20 (1.74-60.11)                    |
| N1 (n = 11)                                                           | 103.3 (0 - 419.6)                     | 130.8 (15.8 - 234.6)                 | 390.0 (281.0-742.0)                   | 0.50 (0.30-4.70)                     | 2.49 (0.89-8.96)                     | 5.02 (0.60-71.13)                    |
| N2 (n = 10)                                                           | 153.3 (26.5 - 11675.8)                | 80.8 (5.8 - 8925.8)                  | 408.5 (276.0-657.0)                   | 3.00 (0.10-17.70)                    | 3.29 (0.23-92.04)                    | 14.79 (2.00-36.87)                   |
| N3 (n = 29)                                                           | 515.8 (138.3 - 0)                     | 205.8 (58.3 - 0)                     | 379.0 (226.0-679.0)                   | 0.50 (0.10-17.60)                    | 2.24 (0.66-90.87)                    | 8.29 (0.60-117.64)                   |
| Significance<br>(N0vs.N1/N0vs.N2/N0vs.N3/<br>N1vs.N2/N1vs.N3/N2vs.N3) | .614/ .476/ .040<br>1.000/ .080/ .134 | .974/ .618/ .455<br>.620/ .294/ .099 | .193/ .123/ .402<br>1.000/ .402/ .437 | .438/ .387/ .720<br>.085/ .858/ .196 | .797/ .756/ .385<br>.557/ .437/ .174 | .468/ .549/ .952<br>.175/ .375/ .480 |
| <b>M Stage</b>                                                        |                                       |                                      |                                       |                                      |                                      |                                      |
| M0 (n = 50)                                                           | 180.8<br>(0 - 515.8)                  | 125.8<br>(25.8 - 733.3)              | 388.0<br>(226.0-742.0)                | 0.50<br>(0.10-17.70)                 | 2.60<br>(0.23-1500.00)               | 6.97<br>(0.60-117.64)                |
| M1 (n = 11)                                                           | 11178.3<br>(1798.3 - 14580.8)         | 113.3<br>(0 - 4839.6)                | 379.0<br>(311.0-679.0)                | 0.50<br>(0.10-7.90)                  | 2.55<br>(0.66-90.87)                 | 16.65<br>(1.74-36.87)                |
| Significance                                                          | .008                                  | .644                                 | .896                                  | .777                                 | .750                                 | .221                                 |

# CA 19-9 was analyzed for 52 patients with gastric tumor.
